# Supplementary material for: Nebulised amphotericin B-polymethacrylic acid nanoparticle prophylaxis prevents invasive aspergillosis
Source: PubMed Central journal article supplement (PMC4503863; doi:10.1016/j.nano.2015.02.012), 2015-07
Supplement: mmc1.pdf [file mmc1.pdf]

**Supplementary Figure 1:**

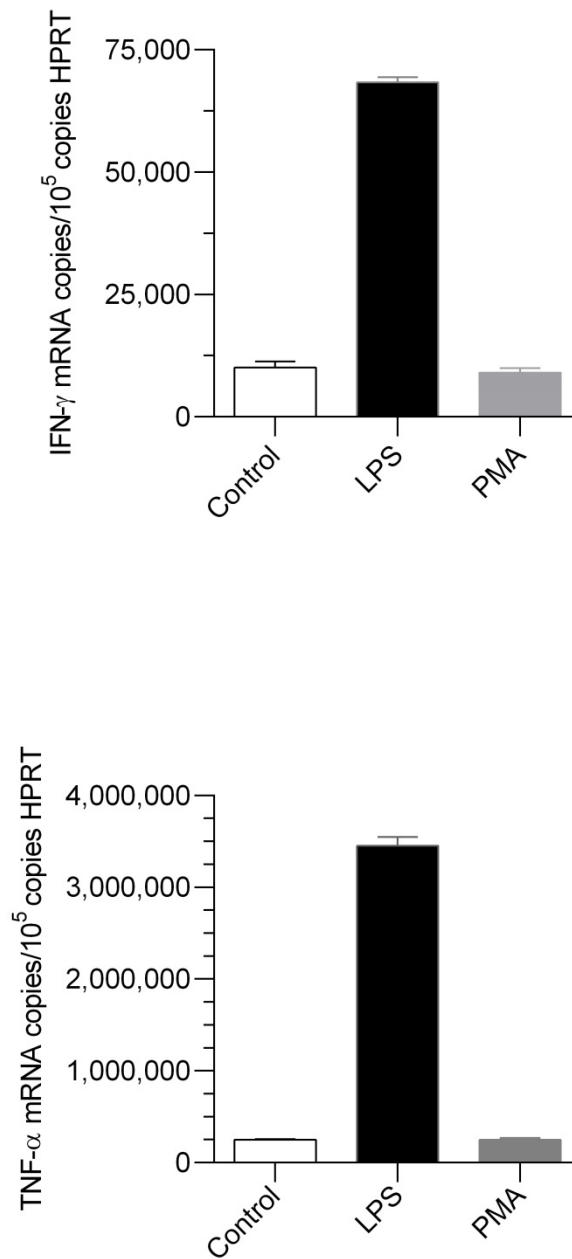

**Lack of a pro-inflammatory effect of PMA-Na on monocyte derived macrophages:**

PMA (3.52 kDa) was incubated with monocyte-derived-macrophages for 3 h at 25 µg/ml. It did not stimulate IFN-γ or TNF-α (n = 9). Similar results were obtained with 1.27 kDa, 1.7 kDa, 7.75 kDa and 18.5 kDa PMA.

## Supplementary Figure 2:

### UV spectra of AmB-PMA (3.52 kDa) and deoxycholate-AmB (Fungizone, Squibb).

The pale yellow powders were reconstituted in water at a final concentration of 10  $\mu\text{g/ml}$  AmB.

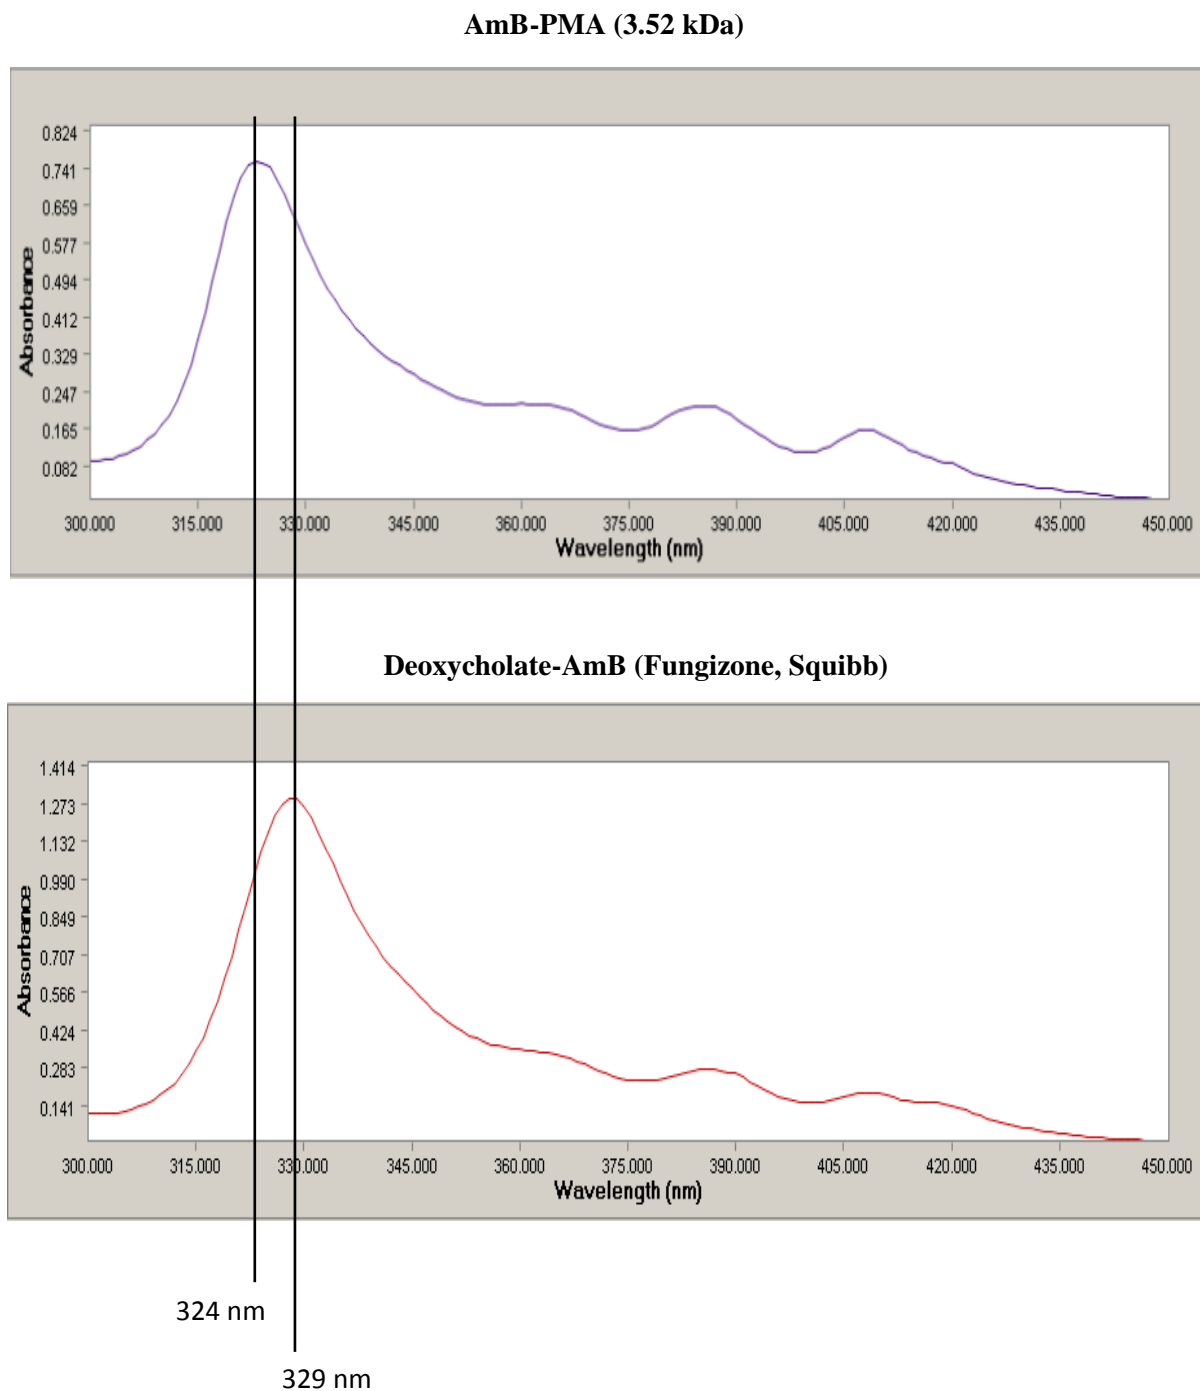

The AmB is highly aggregated in both deoxycholate-AmB (Fungizone, Squibb) and in liposomal AmB (Ambisome, Gilead). The  $\lambda_{\text{max}}$  of the UV spectra of deoxycholate-AmB was 329 nm (shown in red) and of liposomal AmB was 324 nm (not shown; see Reference 6). The  $\lambda_{\text{max}}$  of the UV spectra of AmB-PMA (3.52 kDa) (AP) was 324 nm (shown in blue). Similar results were obtained with 1.27 kDa, 1.7 kDa, 7.75 kDa and 18.5 kDa PMA.

**Supplementary Figure 3:**

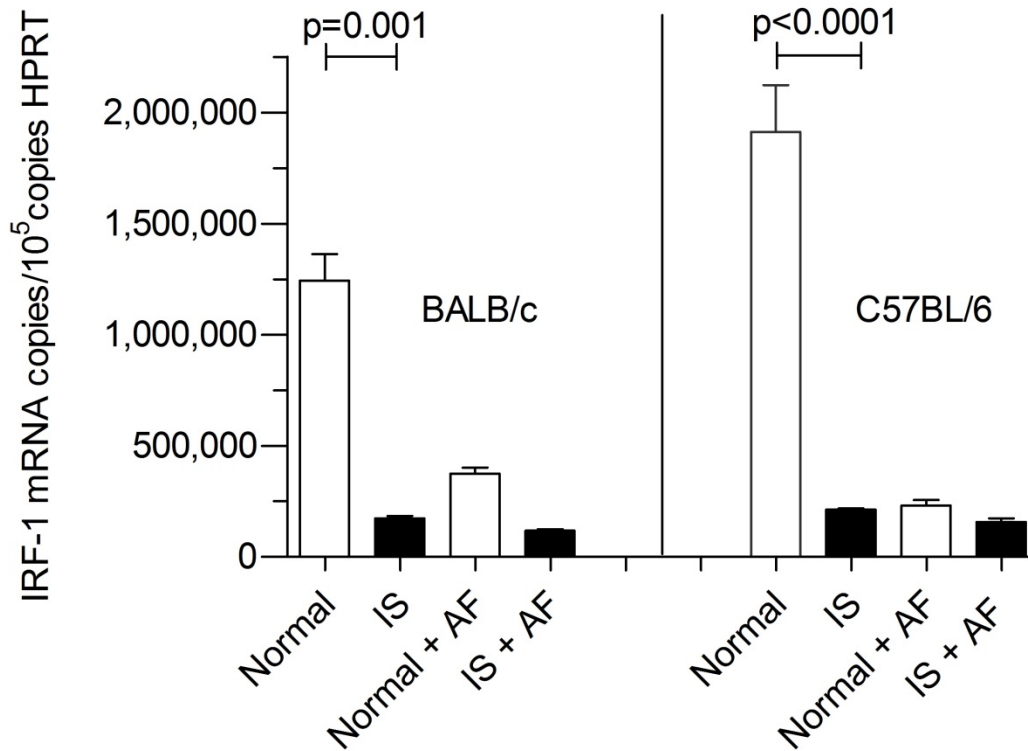

**Comparison of IRF-1 in BALB/c and C57BL/6 mouse lung at day +2:**

Immuno-suppression caused a large and significant suppression of Interferon Regulatory Factor (IRF) -1 that did not change after infection, or with AF pre-exposure prophylaxis (n = 4).

For BALB/c mice:

Normal IRF-1 =  $1.24 \times 10^6 \pm 118,500$  copies/10<sup>5</sup> copies HPRT; IS + AF IRF-1 =  $118,000 \pm 7,890$  copies/10<sup>5</sup> copies HPRT.

For C57BL/6 mice:

Normal IRF-1 =  $1.91 \times 10^6 \pm 210,800$  copies/10<sup>5</sup> copies HPRT; IS + AF IRF-1 =  $157,300 \pm 16,200$  copies/10<sup>5</sup> copies HPRT.

**Supplementary Table 1:**

| Isolate | Name                | AmB-PMA                     | AmB-PMA                     | AmB-PMA                     | AmB-PMA                     | AmB-PMA                     | Fungizone                   |
|---------|---------------------|-----------------------------|-----------------------------|-----------------------------|-----------------------------|-----------------------------|-----------------------------|
|         |                     | (1.27 kDa)                  | (1.7 kDa)                   | (3.52 kDa)                  | (7.75 kDa)                  | (18.5 kDa)                  |                             |
|         |                     | MIC<br>( $\mu\text{g/ml}$ ) | MIC<br>( $\mu\text{g/ml}$ ) | MIC<br>( $\mu\text{g/ml}$ ) | MIC<br>( $\mu\text{g/ml}$ ) | MIC<br>( $\mu\text{g/ml}$ ) | MIC<br>( $\mu\text{g/ml}$ ) |
| J1      | <i>A. fumigatus</i> | 0.25                        | 0.25                        | 0.125                       | 0.125                       | 0.5                         | 0.125                       |
| J2      | <i>A. fumigatus</i> | 0.25                        | 0.25                        | 0.125                       | 0.125                       | 0.25-0.5                    | 0.25                        |
| J3      | <i>A. fumigatus</i> | 0.125                       | 0.125                       | 0.0625                      | 0.0625                      | 0.25                        | 0.0625                      |
| J4      | <i>A. fumigatus</i> | 0.25                        | 1.0                         | 0.125                       | 0.125                       | 0.5                         | 0.125-0.25                  |
| J5      | <i>A. fumigatus</i> | 0.25                        | 1.0                         | 0.125                       | 0.125                       | 0.5                         | 0.125-0.25                  |
| HH-7    | <i>A. fumigatus</i> | 1.0                         | 0.25                        | 0.5                         | 0.5                         | 2.0                         | 0.5                         |
| HH-12   | <i>A. fumigatus</i> | 0.5                         | 0.25                        | 0.25                        | 0.25                        | 1.0                         | 0.25-0.5                    |
| HH-23   | <i>A. fumigatus</i> | 0.25                        | 0.5                         | 0.125                       | 0.125                       | 0.5                         | 0.125-0.25                  |
| HH-24   | <i>A. fumigatus</i> | 0.5                         | 0.5                         | 0.25                        | 0.25                        | 1.0                         | 0.25                        |
| HH-55   | <i>A. fumigatus</i> | 0.25                        | 0.0625                      | 0.125                       | 0.125                       | 0.25                        | 0.125                       |
| CEA10   | <i>A. fumigatus</i> | 0.0625                      | 0.25                        | 0.0312                      | 0.0312                      | 0.125                       | 0.0312                      |

**Summary of the MIC test results shown above:**

| Nanoparticle       | Range of MICs<br>( $\mu\text{g/ml}$ ) | Mean of MICs<br>( $\mu\text{g/ml}$ ) |
|--------------------|---------------------------------------|--------------------------------------|
| AmB-PMA (1.27 kDa) | 0.0625 - 1                            | 0.25                                 |
| AmB-PMA (1.7 kDa)  | 0.0625 - 1                            | 0.25                                 |
| AmB-PMA (3.52 kDa) | 0.0312 - 0.5                          | 0.125                                |
| AmB-PMA (7.75 kDa) | 0.0312 - 0.5                          | 0.125                                |
| AmB-PMA (18.5 kDa) | 0.125 - 2                             | 0.5 - 1.0                            |
| Fungizone          | 0.0312 - 0.5                          | 0.25                                 |

The antifungal activity of the different AmB-PMAs was determined against 11 isolates of *A. fumigatus* up to a final concentration of 16  $\mu\text{g/ml}$ . AmB-PMA (1.27 kDa & 1.7 kDa) had the same MIC as Fungizone (0.25  $\mu\text{g/ml}$ ). In contrast, AmB-PMA (3.52 & 7.75 kDa) had better antifungal activity at 0.125  $\mu\text{g/ml}$  when compared to Fungizone. The anti-fungal activity of the AmB-PMA (18.5 kDa) was 0.5 - 1  $\mu\text{g/ml}$ .
